# Supplementary material
Source: Springer Nature journal article supplement (https://www.springermedizin.de/resource/supplementary/12913_2013_3010_MOESM4_ESM.pdf/9533274)

# Cost Trends without the protocol

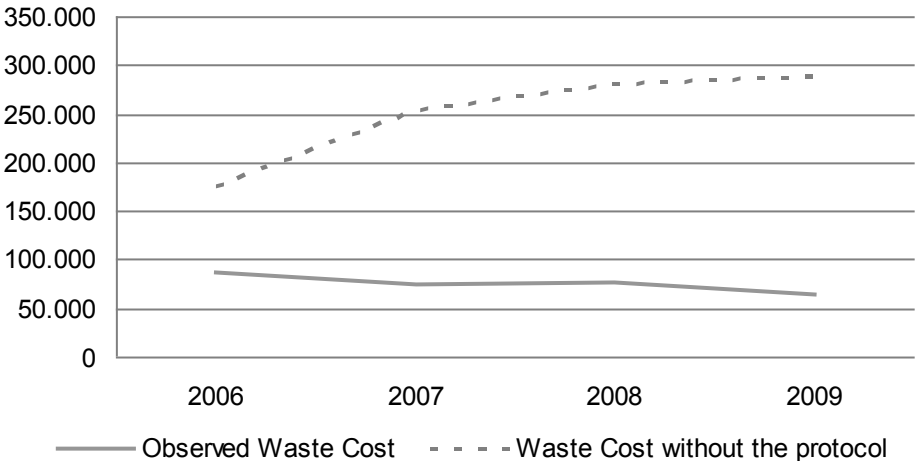

Supplement: MOESM4 [file 9533274]
